# Supplementary material for: Preparation and characterization of sodium-ion conductive Na3BS3 glass and glass–ceramic electrolytes
Source: Royal Society of Chemistry journal article supplement (doi:10.1039/d0ma00777c), 2021-01-01
Supplement: d0ma00777c1.pdf [file d0ma00777c1.pdf]

## Supporting Information

### Preparation and characterization of sodium-ion conductive

### Na<sub>3</sub>BS<sub>3</sub> glass and glass-ceramic electrolytes

Fumika Tsuji,<sup>a</sup> Akira Nasu,<sup>a</sup> Chie Hotehama,<sup>a</sup> Atsushi Sakuda,<sup>a</sup>

Masahiro Tatsumisago,<sup>a</sup> and Akitoshi Hayashi<sup>\*a,b</sup>

<sup>a</sup> Department of Applied Chemistry, Graduate School of Engineering, Osaka Prefecture University,  
1-1 Gakuen-cho, Naka-ku, Sakai, Osaka 599-8531, Japan

<sup>b</sup> Elements Strategy Initiative for Catalysts and Batteries, Kyoto University,  
Sakyo, Kyoto 606-8501, Japan.

\*Correspondence to: hayashi@chem.osakafu-u.ac.jp

**Table S1** Atomic coordinates of the Na<sub>3</sub>BS<sub>3</sub> crystal<sup>18</sup>.

|                              |            |            |                                                                                                |      |           |  |
|------------------------------|------------|------------|------------------------------------------------------------------------------------------------|------|-----------|--|
| Phase                        |            |            | Na <sub>3</sub> BS <sub>3</sub>                                                                |      |           |  |
| Crystal System               |            |            | Monoclinic                                                                                     |      |           |  |
| Spase Group                  |            |            | <i>C</i> 2/ <i>c</i> (No. 15)                                                                  |      |           |  |
| Lattice Parameter, Volume, Z |            |            | <i>a</i> = 11.853 Å, <i>b</i> = 6.664 Å, <i>c</i> = 8.406 Å, <i>V</i> = 585.274 Å <sup>3</sup> |      |           |  |
|                              |            |            | <i>α</i> = 90, <i>β</i> = 118.18, <i>γ</i> = 90, <i>Z</i> = 4                                  |      |           |  |
| Atoms                        | <i>x</i>   | <i>y</i>   | <i>z</i>                                                                                       | Site | Occupancy |  |
| Na1                          | 0.40274(6) | 0.21349(9) | 0.49570(8)                                                                                     | 8f   | 1.0000    |  |
| Na2                          | 0.25000    | 0.25000    | 0.00000                                                                                        | 4c   | 1.0000    |  |
| S1                           | 0.50000    | 0.14347(6) | 0.25000                                                                                        | 4e   | 1.0000    |  |
| S2                           | 0.13550(3) | 0.05790(5) | 0.25321(4)                                                                                     | 8f   | 1.0000    |  |
| B                            | 0.50000    | 0.4217(3)  | 0.25000                                                                                        | 4e   | 1.0000    |  |

**Table S2** Ionic conductivities at 25 °C ( $\sigma_{25}$ ) and activation energy ( $E_a$ ) for conduction of sodium-ion conducting glassy electrolytes.

| Composition                                   | $\sigma_{25} / \text{S cm}^{-1}$ | $E_a / \text{kJ mol}^{-1}$ | Ref. |
|-----------------------------------------------|----------------------------------|----------------------------|------|
| Na <sub>3</sub> PO <sub>4</sub>               | $3.2 \times 10^{-10}$            | 133                        | 20   |
| Na <sub>3</sub> BO <sub>3</sub>               | $1.5 \times 10^{-8}$             | 61                         | 13   |
| Na <sub>3</sub> PS <sub>4</sub>               | $6.0 \times 10^{-6}$             | 47                         | 5    |
| Na <sub>4</sub> P <sub>2</sub> S <sub>7</sub> | $1.6 \times 10^{-6}$             | —                          | 21   |
| NaPS <sub>3</sub>                             | $3.0 \times 10^{-7}$             | —                          | 21   |
| Na <sub>4</sub> B <sub>2</sub> S <sub>5</sub> | $4.4 \times 10^{-7}$             | 48                         | 14   |

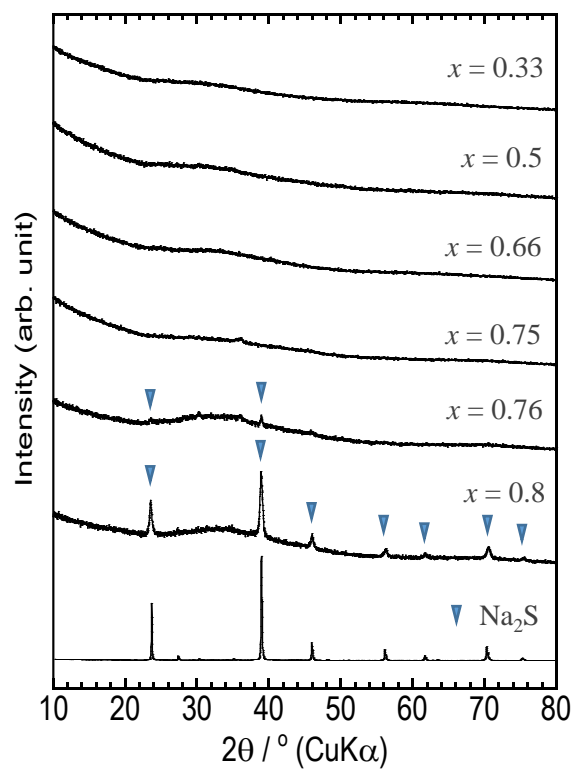

**Fig. S1** XRD patterns of  $x\text{Na}_2\text{S} \cdot (1-x)\text{B}_2\text{S}_3$  glass electrolytes synthesized via a mechanochemical process from the crystal corresponding to each composition.

(a)

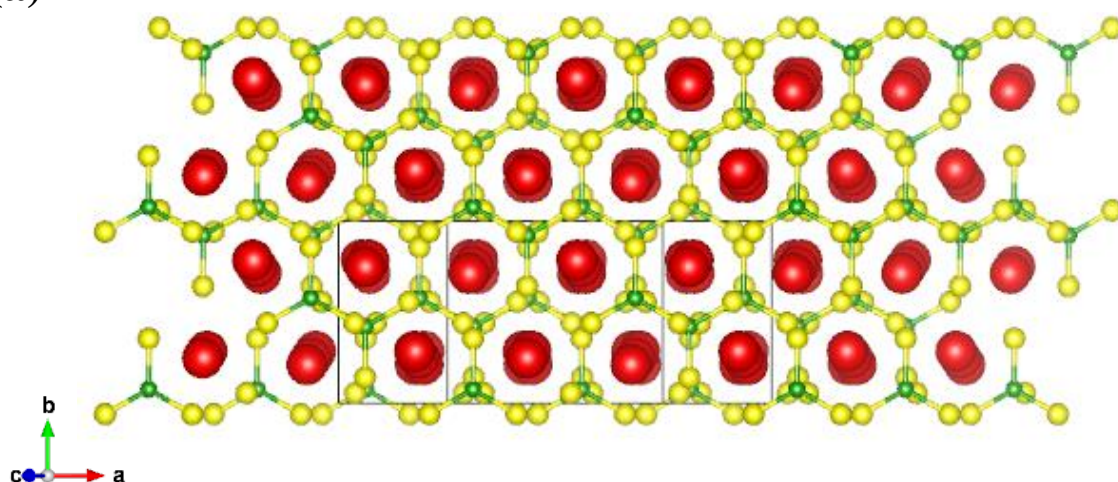

(b)

Layers of monoclinic structure

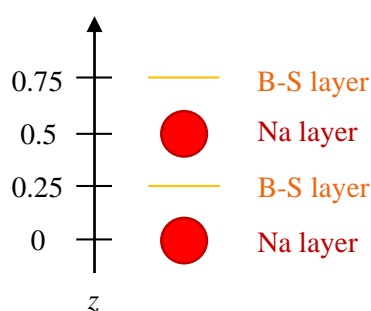

Arranged  
on one layer

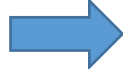

Image diagram of monoclinic structure

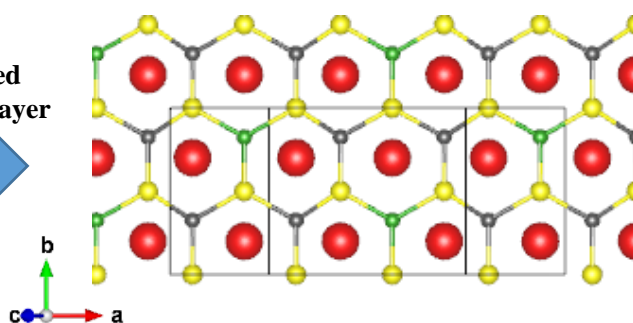

**Fig. S2** (a) Schematic diagram of the crystal structure of monoclinic  $\text{Na}_3\text{BS}_3$ .<sup>18</sup> The red, green, and yellow spheres are Na, B, and S, respectively. (b) Image diagram of the monoclinic structure. The Na layers and B–S layers located at different z-positions are shown on the left. The right shows the arrangement of atoms in one layer. The B sites of the B–S layers are 1/3 occupied. Three-coordinated unoccupied B sites are shown as gray spheres.

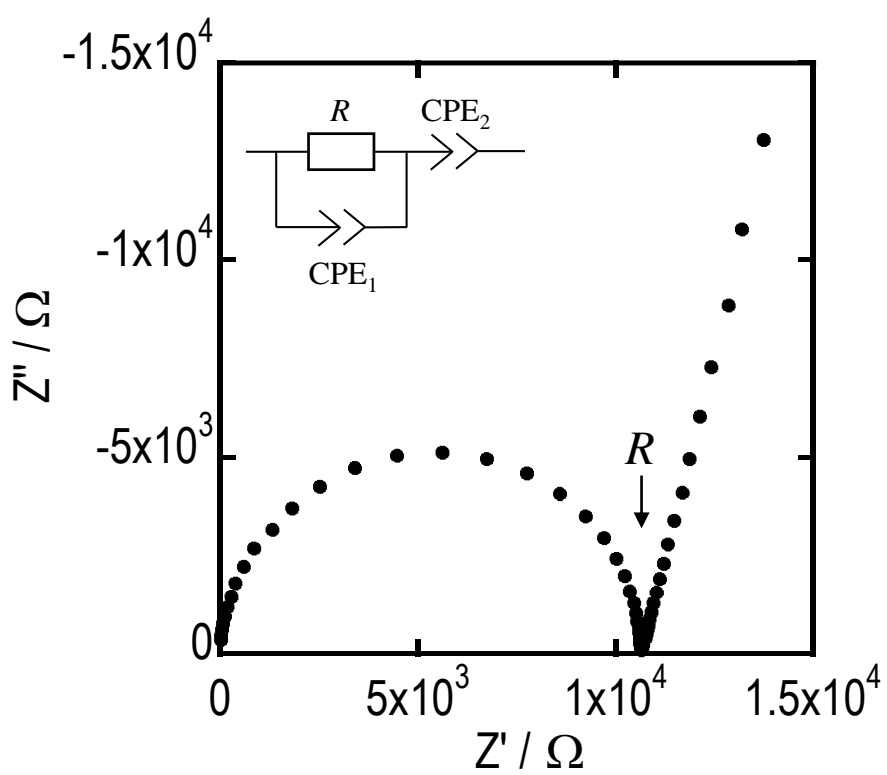

**Fig. S3** Nyquist plot at  $30\text{ }^\circ\text{C}$  of  $\text{Na}_3\text{BS}_3$  glass.

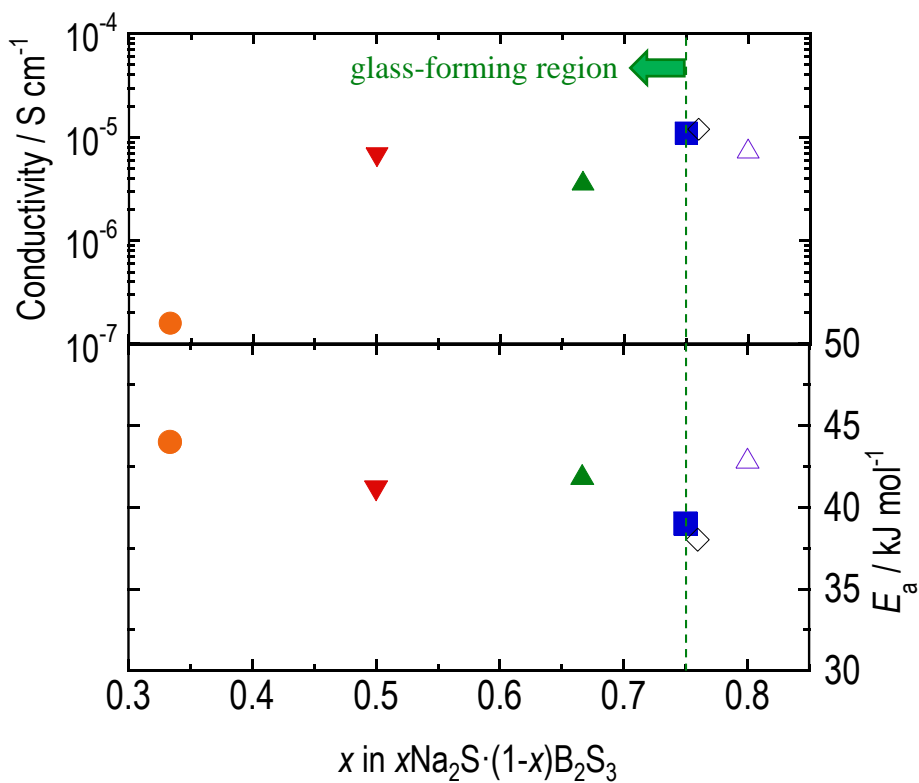

**Fig. S4** Room-temperature ionic conductivities and activation energies ( $E_a$ ) for conduction of  $x\text{Na}_2\text{S} \cdot (1-x)\text{B}_2\text{S}_3$  glass electrolytes.

(a)

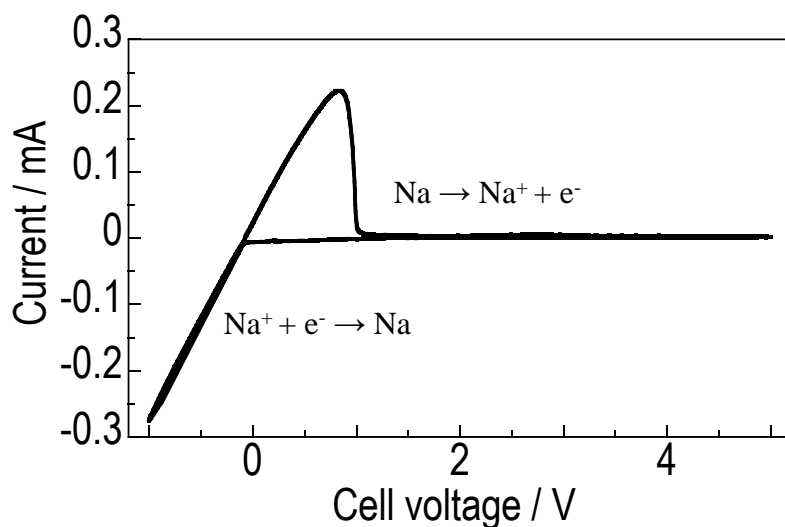

(b)

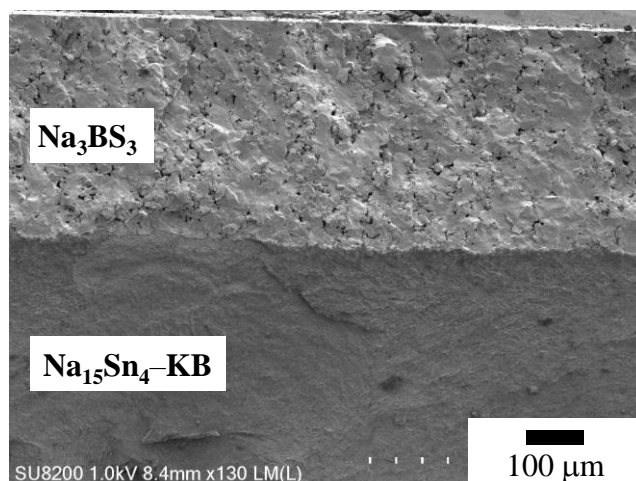

**Fig. S5** (a) Cyclic voltammogram of the  $\text{Na}_3\text{BS}_3$  glass. Stainless-steel and  $\text{Na}_{15}\text{Sn}_4\text{-KB}$  was used as working and counter electrodes, respectively. The potential sweep was performed with a scanning rate of  $5.0 \text{ mV min}^{-1}$  at  $60^\circ\text{C}$ . (b) Cross-sectional SEM image of the cell after cyclic voltammetry. The working electrode of stainless steel was removed from the cell and two layers of  $\text{Na}_3\text{BS}_3$  /  $\text{Na}_{15}\text{Sn}_4\text{-KB}$  are observed.
